# Supplementary material for: A computationally efficient parameterization of aerosol, cloud and precipitation pH for application at global and regional scale (EQSAM4Clim-v12)
Source: Copernicus journal article supplement (doi:10.5194/gmd-17-5009-2024), 2024-06-27
Supplement: Supplementary file 1 [file gmd-17-5009-2024-supplement.pdf]

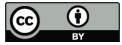

*Supplement of*

**A computationally efficient parameterization of aerosol, cloud and precipitation pH for application at global and regional scale (EQSAM4Clim-v12)**

**Swen Metzger et al.**

*Correspondence to:* Swen Metzger (sm@researchconcepts.io)

The copyright of individual parts of the supplement might differ from the article licence.

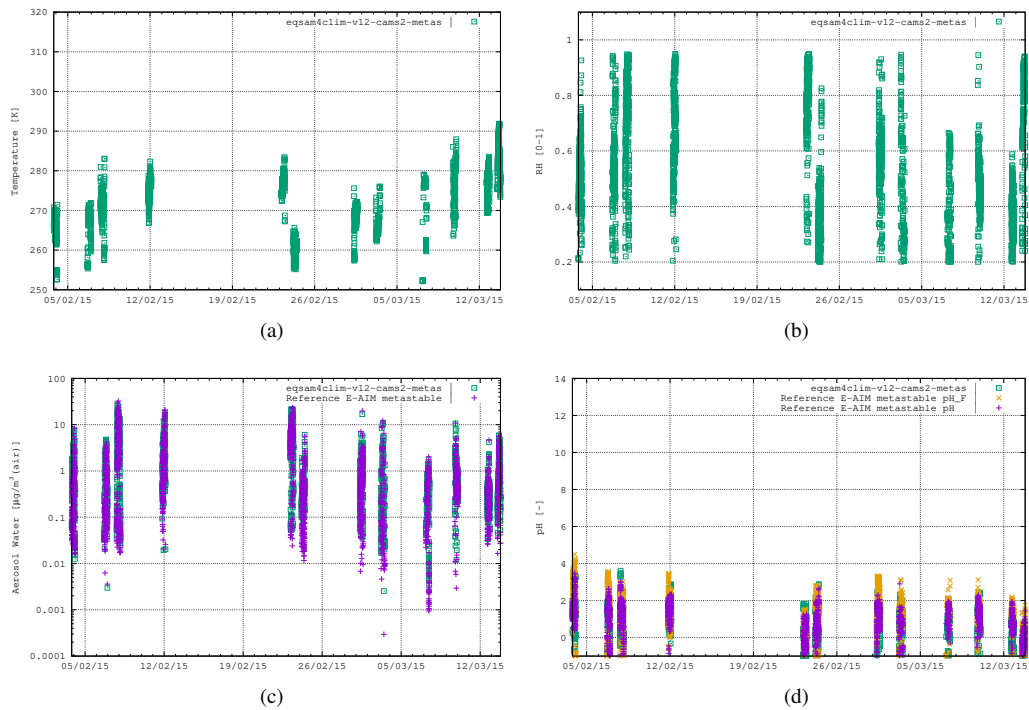

**Figure S1.** Figure 6 with real time axis instead of data point number.
